# Supplementary material
Source: PubMed Central journal article supplement (PMC7054133)
Supplement: NIHMS1067209-supplement-1.pdf [file NIHMS1067209-supplement-1.pdf]

Supplemental Table 1: Baseline Characteristics in Patients With and Without CARG Toxicity Risk Score

|                                | CARG Toxicity Risk Score |                    | p value |
|--------------------------------|--------------------------|--------------------|---------|
|                                | Available (N=669)        | Unavailable (N=34) |         |
| <b>Age</b>                     |                          |                    | 0.23    |
| N                              | 669                      | 34                 |         |
| Mean (SD)                      | 73.0 (5.98)              | 72.0 (6.45)        |         |
| Median                         | 72.0                     | 71.0               |         |
| Q1, Q3                         | 68.0, 77.0               | 67.0, 76.0         |         |
| Range                          | (65.0-94.0)              | (65.0-91.0)        |         |
| <b>Hemoglobin</b>              |                          |                    | 0.26    |
| N                              | 669                      | 25                 |         |
| Mean (SD)                      | 12.2 (1.57)              | 11.9 (1.84)        |         |
| Median                         | 12.3                     | 11.9               |         |
| Q1, Q3                         | 11.2, 13.3               | 10.5, 13.4         |         |
| Range                          | (3.0-16.5)               | (8.6-16.8)         |         |
| <b>Creatinine clearance</b>    |                          |                    | 0.69    |
| N                              | 669                      | 19                 |         |
| Mean (SD)                      | 58.1 (18.12)             | 61.3 (19.69)       |         |
| Median                         | 57.4                     | 56.1               |         |
| Q1, Q3                         | 45.6, 69.2               | 44.9, 76.8         |         |
| Range                          | (12.3-122.9)             | (37.5-101.2)       |         |
| <b>Gender</b>                  |                          |                    | 0.79    |
| Female                         | 378 (56.5%)              | 20 (58.8%)         |         |
| Male                           | 291 (43.5%)              | 14 (41.2%)         |         |
| <b>Race</b>                    |                          |                    | 0.18    |
| White                          | 570 (85.2%)              | 25 (73.5%)         |         |
| Black                          | 51 (7.6%)                | 5 (14.7%)          |         |
| Others                         | 48 (7.2%)                | 4 (11.8%)          |         |
| <b>Education</b>               |                          |                    | 0.54    |
| Less than high school          | 20 (3%)                  | 2 (5.9%)           |         |
| High school graduate           | 226 (33.8%)              | 10 (29.4%)         |         |
| Associate/bachelor's degree    | 281 (42.1%)              | 17 (50%)           |         |
| Advanced degree                | 141 (21.1%)              | 5 (14.7%)          |         |
| Missing                        | 1                        | 0                  |         |
| <b>Cancer type</b>             |                          |                    | 0.06    |
| Breast                         | 107 (16%)                | 2 (5.9%)           |         |
| Gastrointestinal/Genitourinary | 256 (38.3%)              | 8 (23.5%)          |         |
| Gynecological                  | 94 (14.1%)               | 8 (23.5%)          |         |
| Lung                           | 182 (27.2%)              | 13 (38.2%)         |         |
| Lymphoma                       | 30 (4.5%)                | 3 (8.8%)           |         |
| <b>Cancer stage</b>            |                          |                    | 0.15    |
| I                              | 30 (4.5%)                | 2 (5.9%)           |         |
| II                             | 93 (14%)                 | 1 (2.9%)           |         |
| III                            | 162 (24.5%)              | 6 (17.6%)          |         |
| IV/Extensive                   | 377 (56.9%)              | 25 (73.5%)         |         |
| Missing                        | 7                        | 0                  |         |
| <b>Number of Comorbidities</b> |                          |                    | 0.53    |
| 0-1                            | 211 (31.5%)              | 9 (26.5%)          |         |

|                                                                       | CARG Toxicity Risk Score |                    | p value |
|-----------------------------------------------------------------------|--------------------------|--------------------|---------|
|                                                                       | Available (N=669)        | Unavailable (N=34) |         |
| ≥2                                                                    | 458 (68.5%)              | 25 (73.5%)         |         |
| <b>Polychemotherapy</b>                                               |                          |                    | 0.95    |
| No                                                                    | 200 (29.9%)              | 10 (29.4%)         |         |
| Yes                                                                   | 469 (70.1%)              | 24 (70.6%)         |         |
| <b>Standard dose chemotherapy</b>                                     |                          |                    | 0.04    |
| Standard dose                                                         | 487 (74.9%)              | 30 (90.9%)         |         |
| Dose reduced                                                          | 163 (25.1%)              | 3 (9.1%)           |         |
| Missing                                                               | 19                       | 1                  |         |
| <b>Impaired hearing</b>                                               |                          |                    | 0.76    |
| Excellent/good                                                        | 509 (76.1%)              | 22 (78.6%)         |         |
| Fair/poor/deaf                                                        | 160 (23.9%)              | 6 (21.4%)          |         |
| Missing                                                               | 0                        | 6                  |         |
| <b>Falls in the past 6 months</b>                                     |                          |                    | 0.35    |
| 0                                                                     | 541 (80.9%)              | 28 (87.5%)         |         |
| ≥1                                                                    | 128 (19.1%)              | 4 (12.5%)          |         |
| Missing                                                               | 0                        | 2                  |         |
| <b>Help with taking medications</b>                                   |                          |                    | 0.14    |
| No assistance                                                         | 631 (94.3%)              | 30 (88.2%)         |         |
| Require assistance                                                    | 38 (5.7%)                | 4 (11.8%)          |         |
| <b>Limited in walking one block</b>                                   |                          |                    | 0.97    |
| Not limited                                                           | 511 (76.4%)              | 23 (76.7%)         |         |
| Limited                                                               | 158 (23.6%)              | 7 (23.3%)          |         |
| Missing                                                               | 0                        | 4                  |         |
| <b>Decreased social activity because of health/emotional problems</b> |                          |                    | 0.32    |
| A little or none of the time                                          | 568 (85.2%)              | 26 (78.8%)         |         |
| Some, most, or all of the time                                        | 99 (14.8%)               | 7 (21.2%)          |         |
| Missing                                                               | 2                        | 1                  |         |
| <b>Grade 3 to 5 chemotherapy toxicity</b>                             |                          |                    | 0.89    |
| No                                                                    | 303 (45.3%)              | 15 (44.1%)         |         |
| Yes                                                                   | 366 (54.7%)              | 19 (55.9%)         |         |
